# Supplementary material for: Candida utilis and Chlorella vulgaris Counteract Intestinal Inflammation in Atlantic Salmon (Salmo salar L.)
Source: PubMed Central journal article supplement (PMC3873917; doi:10.1371/journal.pone.0083213), 2013-12-27
Supplement: pone.0083213.s007.pdf [file pone.0083213.s007.pdf]

|                       | <i>L.prop</i> | Epit. | Atrophy | Oedema |
|-----------------------|---------------|-------|---------|--------|
| Epit.                 | 0.94          |       |         |        |
| Atrophy               | 0.92          | 0.95  |         |        |
| Oedema                | 0.81          | 0.87  | 0.87    |        |
| $\log_2(\text{PCNA})$ | 0.68          | 0.70  | 0.67    | 0.61   |
