# Supplementary material for: Candida utilis and Chlorella vulgaris Counteract Intestinal Inflammation in Atlantic Salmon (Salmo salar L.)
Source: PubMed Central journal article supplement (PMC3873917; doi:10.1371/journal.pone.0083213), 2013-12-27
Supplement: pone.0083213.s008.pdf [file pone.0083213.s008.pdf]

TABLE 21

| Acc      | Gene Name                                                | Forward 5'-3'          | Reverse 5'-3'         |
|----------|----------------------------------------------------------|------------------------|-----------------------|
| BT050045 | Glyceraldehyde 3-phosphate dehydrogenase                 | AAGTGAAGCAGGAGGGTGGAA  | CAGCCTCACCCCATTTGATG  |
| BG933853 | Elongation factor 1-alpha                                | TGCCCCCTCCAGGATGTCTAC  | CACGGCCCACAGGTACTG    |
| CB514404 | Lysosomal alpha-mannosidase                              | ACTGCAGCCTCTCATCTCGT   | TGCCTGTAGCCCAGAGAACT  |
| CK885977 | Keratin, type I cytoskeletal 18                          | ATGGGCAATGAGAAGTTTGC   | TCCAGGTTCCCTCACCATCTC |
| DY692675 | Hepcidin-1                                               | AGTCATGGATATGGCGAAGG   | GTGCGATGTTGATGGTGATG  |
| EG845759 | Phosphatidylinositol 4-phosphate 1 5-kinase-like protein | ATTCCATGGCCAGAGTGTTTC  | TAAAGCCCATGGACCAAGAC  |
| TC113038 | Sialin                                                   | CACCAACAACCTTTCGCGACTA | TGCCAAACAAGGTGAAGACA  |
| AY360357 | cathelicidin 2                                           | GGAGACGCTCTGCAGTAAGG   | AGCATCTTCTGCCTCCATGT  |
| EG781611 | Defensin b4                                              | CCATTTGGACCTTTTGGATG   | TGGAGGAACATCAATGCAGA  |
