# Supplementary material for: Candida utilis and Chlorella vulgaris Counteract Intestinal Inflammation in Atlantic Salmon (Salmo salar L.)
Source: PubMed Central journal article supplement (PMC3873917; doi:10.1371/journal.pone.0083213), 2013-12-27
Supplement: pone.0083213.s009.pdf [file pone.0083213.s009.pdf]

| Contrast | $\log_2FC$ Microarray | $\log_2FC$ qRT-PCR | Gene Name                                                |
|----------|-----------------------|--------------------|----------------------------------------------------------|
| CV-FM    | -0.52                 | -1.07              | Lysosomal alpha-mannosidase                              |
| CV-FM    | -0.67                 | -1.36              | Sialin                                                   |
| CV-FM    | 0.17                  | 0.11               | Solute carrier family 13 member 2                        |
| CV-FM    | 0.28                  | 0.29               | Keratin, type I cytoskeletal 18                          |
| CV-FM    | 0.50                  | 1.14               | Phosphatidylinositol 4-phosphate 5-kinase-like protein 1 |
| CU-FM    | -0.86                 | -1.08              | Lysosomal alpha-mannosidase                              |
| CU-FM    | -0.58                 | -0.88              | Sialin                                                   |
| CU-FM    | -0.66                 | -0.47              | Solute carrier family 13 member 2                        |
| CU-FM    | 0.48                  | 0.11               | Keratin, type I cytoskeletal 18                          |
| CU-FM    | 0.57                  | 0.63               | Phosphatidylinositol 4-phosphate 5-kinase-like protein 1 |
| KM-FM    | -0.74                 | -0.77              | Lysosomal alpha-mannosidase                              |
| KM-FM    | -0.97                 | -1.10              | Sialin                                                   |
| KM-FM    | -0.05                 | 0.24               | Solute carrier family 13 member 2                        |
| KM-FM    | 0.49                  | 0.68               | Keratin, type I cytoskeletal 18                          |
| KM-FM    | 0.49                  | 1.06               | Phosphatidylinositol 4-phosphate 5-kinase-like protein 1 |
| SC-FM    | -2.16                 | -2.36              | Lysosomal alpha-mannosidase                              |
| SC-FM    | -0.80                 | -1.29              | Sialin                                                   |
| SC-FM    | -2.70                 | -2.13              | Solute carrier family 13 member 2                        |
| SC-FM    | 0.79                  | 0.91               | Keratin, type I cytoskeletal 18                          |
| SC-FM    | 1.08                  | 1.51               | Phosphatidylinositol 4-phosphate 5-kinase-like protein 1 |
| SBM-FM   | -2.15                 | -2.28              | Lysosomal alpha-mannosidase                              |
| SBM-FM   | -1.07                 | -0.45              | Sialin                                                   |
| SBM-FM   | -2.09                 | -2.25              | Solute carrier family 13 member 2                        |
| SBM-FM   | 1.05                  | 0.80               | Keratin, type I cytoskeletal 18                          |
| SBM-FM   | 1.06                  | 0.77               | Phosphatidylinositol 4-phosphate 5-kinase-like protein 1 |
